# Supplementary material for: Red light-promoted skin barrier recovery: Spatiotemporal evaluation by transepidermal potential
Source: PLoS One. 2019 Jul 10;14(7):e0219198. doi: 10.1371/journal.pone.0219198 (PMC6620005; doi:10.1371/journal.pone.0219198)
Supplement: S1 Table — (XLSX) [file pone.0219198.s006.xlsx]

## Sheet: Sheet1
	Fig 2 (b)		Red 40mW/cm2 1 h [%]					Red 40mW/cm2 1 h (probe) [%]					Control [%]
		Pristine	100	100	100	100	100	100	100	100	100	100	100	100	100	100	100
		after Barrier Disruption	71.0644	68.2392	52.3692	45.6299	63.2332	75.4971	55.4697	64.306	42.9	57.0367	58.0432	39.8967	40.9065	63.7879	56.4387
		after 1 h Irradiation	99.8549	104.183	80.365	87.5363	90.4815	98.1222	88.0668	96.7455	89.3255	93.6089	54.6949	66.6516	54.8096	60.6493	77.4156
		1h Post-Irradiation	108.036	104.44	94.437	108.64	97.2986	92.3695	108.117	98.0728	94.9349	93.8825	57.3017	62.8593	69.899	65.0169	84.1683
	Fig 2 (c)		Blue 40mW/cm2 1 h [%]					Purple 21mW/cm2 1 h [%]
		Pristine	100	100	100	100	100	100	100	100	100	100
		after Barrier Disruption	48.3667	44.6095	54.2739	53.9638	64.2805	52.1239	52.4153	46.3825	66.6859	49.2262
		after 1 h Irradiation	79.7638	49.8624	60.945	60.6337	55.1836	62.2768	58.6642	50.5516	67.6115	51.6054
		1h Post-Irradiation	80.5684	51.5179	70.3958	64.4067	65.9622	71.983	59.5962	58.6402	68.1867	55.0843
	Fig 3		Red 40mW/cm2 10 min [%]					Red 60mW/cm2 60 min [%]
		Pristine	100	100	100	100	100	100	100	100	100	100
		after Barrier Disruption	49.8546	44.5426	59.261	61.9327	68.1882	68.609	43.4	62.7681	66.8241	60.5459
		after 10 min Irradiation	89.8892	85.2556	98.1971	54.7834	84.6416
		after 1 h Irradiation						100.705	51.9436	85.5394	78.2516	57.4809
		1h Post-Irradiation	102.99	99.016	83.511	79.3983	103.523	106.809	71.4462	90.6872	91.1047	88.0987
	Fig 4 (b)		0 mm [%]					20 mm [%]					40 mm [%]					Control [%]
		Pristine	100	100	100	100	100	100	100	100	100	100	100	100	100	100	100	100	100	100	100	100
		after Barrier Disruption	73.995	74.4631	38.1529	53.2892	62.0558	62.6676	48.2252	35.0006	61.9925	58.598	72.462	67.0642	42.1213	71.3072	48.8375	60.4561	41.4967	40.1181	63.7053	56.0181
		after 1 h Irradiation	104.738	84.6576	60.7481	87.2362	64.2718	104.142	48.419	74.3317	96.3767	87.0018	78.7001	56.7515	50.047	80.5031	90.8629	55.9535	69.6246	57.2005	61.026	78.0372
		1h Post-Irradiation	110.751	80.1513	81.1645	101.626	105.895	99.6643	58.7179	63.8298	96.6151	92.1261	71.868	57.2161	53.1741	79.421	101.692	60.1233	68.9037	68.5462	65.2583	84.4173
	S1 Fig		Sample 1 [µm]	Sample 2 [µm]	Sample 3 [µm]	Sample 4 [µm]	Sample 5 [µm]
		Area 1	104.108	73.9536	106.096	101.434	168.36
		Area 2	59.3073	177.207	96.0646	61.1323	95.5327
		Area 3	60.7943	103.913	138.967	95.5169	92.6176
		mean	74.7366	118.358	113.709	86.0278	118.837
	S2 Fig		Red 40mW/cm2 20 min [%]					Red 40mW/cm2 30 min [%]
		Pristine	100	100	100	100	100	100	100	100	100	100
		after Barrier Disruption	40.0767	69.3144	55.8851	65.1482	61.2819	55.7854	57.8917	68.7548	60.8947	66.8692
		after 20 min Irradiation						102.879	79.5952	104.995	77.4243	92.2271
		after 30 min Irradiation	89.8292	98.6603	61.1368	85.2352	94.0543	93.6879	75.4663	96.6188	91.8908	79.5034
		after 1 h Irradiation	99.2017	103.983	53.7143	93.9358	91.1693	106.184	73.7134	113.304	99.5678	89.6447
		1h Post-Irradiation	91.3291	104.832	48.6193	107.181	86.5957	88.5987	88.6885	119.5	102.058	94.1514
	S3 Fig		Blue 40mW/cm2 1 h Epidermis [%]					Blue 40mW/cm2 1 h Dermis [%]
		Pristine	100	100	100	100	100	100	100	100	100	100
		after Barrier Disruption	63.2932	58.9067	67.5574	67.4779	54.4922	77.3764	61.0701	48.3115	72.6665	69.7035
		after 1 h Irradiation	80.0972	82.3562	32.1362	77.0898	79.5971	76.8448	72.1437	72.0097	89.1395	83.1637
		1h Post-Irradiation	89.1784	85.7092	72.1171	84.4511	77.5589	90.9033	71.7358	74.9969	75.3777	88.3643
	S4 Fig	Times of Tape Stripping	TEWL [g/m2/h]	TEP [mV]
		0	8.51	-10.1222
		1	8.69	-9.55779
		4	10.8	-9.36435
		7	13.18	-8.76441
